# Supplementary material for: Tuning the Fe(II)/hydroxide Ratio during Synthesis of Magnetite Nanoparticles to Maximize Cr(VI) Uptake Capacity
Source: MDPI journal article supplement (doi:10.3390/w14091335), 2022-04-20
Supplement: s1 [file s1]

## Supporting information

### Tuning the Fe(II)/hydroxide ratio during synthesis of magnetite nanoparticles to maximize Cr(VI) uptake capacity

Kyriaki Kalaitzidou, Evangelia Chioti, Theopoula Asimakidou, Dimitrios Karfaridis, George Vourlias, Manassis Mitrakas, Konstantinos Simeonidis

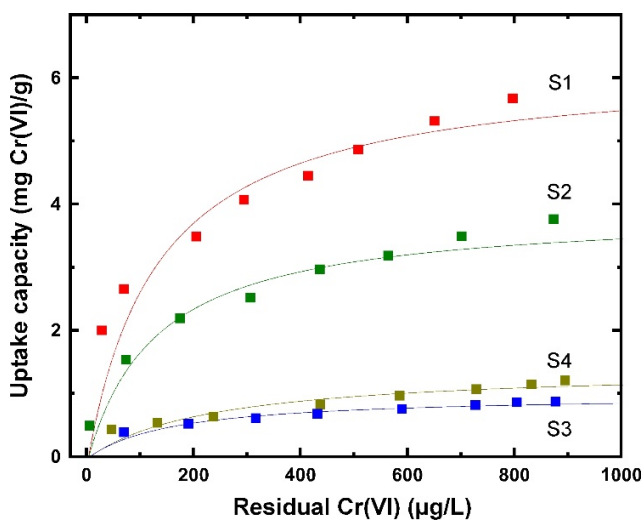

**Figure S1.** Langmuir fitting of Cr(VI) uptake isotherms for samples S1, S2, S3, and S4 in the residual concentration range 0-1000 µg/L at equilibrium pH 7.

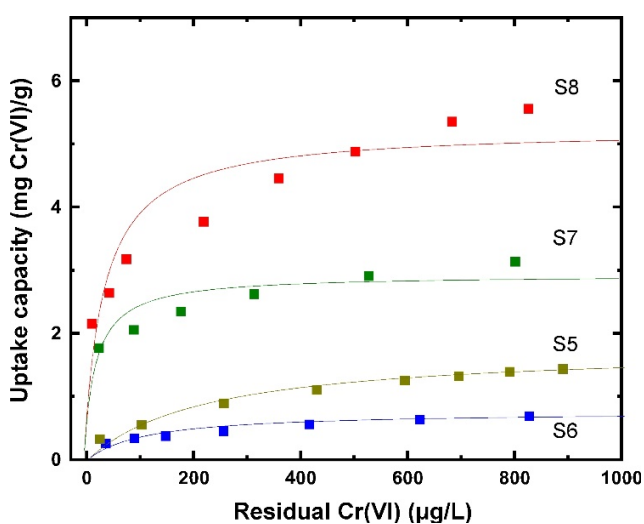

**Figure S2.** Langmuir fitting of Cr(VI) uptake isotherms for samples S5, S6, S7, and S8 in the residual concentration range 0-1000 µg/L at equilibrium pH 7.

**Table S1.** Langmuir fitting parameters of the uptake isotherms data for studied samples.

| Sample | $K_L$<br>L/ $\mu$ g | $Q_{max}$<br>$\mu$ g/mg <sub>ads</sub> | $R^2$ |
|--------|---------------------|----------------------------------------|-------|
| S1     | 0.0075              | 6.229                                  | 0.910 |
| S2     | 0.0076              | 3.916                                  | 0.967 |
| S3     | 0.0061              | 0.999                                  | 0.919 |
| S4     | 0.0042              | 1.427                                  | 0.888 |
| S5     | 0.0277              | 5.210                                  | 0.787 |
| S6     | 0.0476              | 2.900                                  | 0.760 |
| S7     | 0.0086              | 0.736                                  | 0.909 |
| S8     | 0.0044              | 1.753                                  | 0.974 |
